# Supplementary material for: The Positive Relationship between Moderate-to-Vigorous Physical Activity and Bone Mineral Content Is Not Mediated by Free Leptin Index in Prepubertal Children: The PANIC Study
Source: MDPI journal article supplement (doi:10.3390/ijerph18105365), 2021-05-18
Supplement: s1 [file s1]

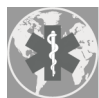

**Table S1.** Differences in participant characteristics between included and excluded children.

|                         | Included children ( <i>n</i> = 401) | Excluded children ( <i>n</i> = 83 to 103) | <i>p</i> value for group difference |
|-------------------------|-------------------------------------|-------------------------------------------|-------------------------------------|
|                         | Mean (SD) / Median (IQR)            | Mean (SD) / Median (IQR)                  |                                     |
| Age (years)             | 7.6 (0.4)                           | 7.6 (0.4)                                 | 0.182                               |
| Stature (cm)            | 128.7 (5.6)                         | 129.3 (5.9)                               | 0.312                               |
| IOTF Definition         |                                     |                                           |                                     |
| % (cases) normal weight | 88.8 (356)                          | 79.6 (82)                                 | <b>0.025</b>                        |
| % (cases) overweight    | 8.0 (32)                            | 11.7 (12)                                 |                                     |
| % (cases) obese         | 3.2 (13)                            | 8.7 (9)                                   |                                     |
| TBLH BMC (g)            | 0.67 (0.13)                         | 0.70 (0.17)                               | 0.051                               |
| TBLH FM (kg)            | 4.34 (2.96 to 6.19)                 | 4.59 (2.84 to 8.69)                       | 0.217                               |
| Free Leptin Index       | 8.82 (5.84 to 16.14)                | 10.02 (5.88 to 22.19)                     | 0.194                               |

International obesity task force, IOTF; total body less head, TBLH; bone mineral content, BMC; fat mass, FM.; Values in bold indicate significant *p*-values (< 0.05). Number of children (*n*) varies for different variables; *n* = 504, 401 included and 103 excluded: age, stature, IOTF definition; *n* = 493, 401 included and 92 excluded: TBLH BMC, TBLH FM; *n* = 484, 401 included and 83 excluded: Free Leptin Index.

**Table S2.** Associations between MVPA, free leptin index and total body less head bone mineral content (outcome model) and associations between free leptin index and MVPA (mediator model).

|                                                    | Girls ( <i>n</i> = 194)      |                 | Boys ( <i>n</i> = 207)       |                 |
|----------------------------------------------------|------------------------------|-----------------|------------------------------|-----------------|
|                                                    | $\beta$ (95% CI)             | <i>p</i> -value | $\beta$ (95% CI)             | <i>p</i> -value |
| <b>Outcome Model</b>                               |                              |                 |                              |                 |
| MVPA <sup>a</sup>                                  | 0.0004 (0.0002 to 0.0006)    | <b>0.001</b>    | 0.0003 (0.0001 to 0.0005)    | <b>0.001</b>    |
| Free Leptin Index <sup>a</sup>                     | -0.0457 (-0.0907 to -0.0006) | <b>0.047</b>    | -0.0845 (-0.1376 to -0.0314) | <b>0.002</b>    |
| MVPA <sup>a</sup> X Free Leptin Index <sup>a</sup> | -0.00051 (-0.0013 to 0.0002) | 0.155           | 0.0000 (-0.0005 to 0.0006)   | 0.938           |
| <b>Mediator Model</b>                              |                              |                 |                              |                 |
| Free Leptin Index <sup>a</sup>                     | 0.0002 (-0.0005 to 0.0009)   | 0.536           | -0.0004 (-0.0009 to 0.0002)  | 0.175           |

All models adjusted for age, stature, and TBLH fat mass. Total body less head, TBLH; Moderate-to-vigorous physical activity, MVPA. <sup>a</sup>Free Leptin Index was log-transformed. <sup>a</sup>MVPA was mean-centred. Values in bold indicate significant *p*-values (*p* < 0.05).

**Table S3.** Fixed values used in Med4Way analysis.

|                                                  | Girls    | Boys     |
|--------------------------------------------------|----------|----------|
| MVPA reference value (median value)              | 118.3406 | 136.5738 |
| MVPA actual value (75th percentile)              | 145.2338 | 164.3532 |
| Log transformed Free Leptin Index (median value) | 1.0265   | 0.8370   |
| TBLH FM (median value)                           | 4.7250   | 3.7890   |
| Stature (median value)                           | 128.000  | 130.300  |
| Age (median value)                               | 7.6350   | 7.6400   |

Moderate-to-vigorous physical activity, MVPA; total body less head fat mass, TBLH FM.
